# 1 **Alteration of fecal microbial compositions and** 2 **bacterial taxa in female osteoporotic patients**

3 Cuifeng Zhu<sup>1,2,3,★</sup>, Jianguo Liu<sup>1★</sup>, Yong Pan<sup>2,3★</sup>, Ye Fan<sup>4</sup>, Leigang Jin<sup>2,3</sup>, Yan Liu<sup>1</sup>,  
4 Zhentian Zhang<sup>1</sup>, Yu Gan<sup>5</sup>, Wei Tang<sup>6</sup>, Jinhuan Li<sup>6</sup>, Zhuang Xiong<sup>6</sup>, Genming  
5 Xu<sup>6</sup>, Xiuping Lin<sup>1</sup>, Yuan Zhang<sup>1</sup>, JinChuan Cai<sup>1</sup>, Muxiu Yang<sup>1</sup>, Leijun Zhang<sup>1</sup>,  
6 Liehui Xiao<sup>1</sup>, Yi Pan<sup>7#</sup>, Kejian Wang<sup>5#</sup>, Aimin Xu<sup>2,3#</sup>

7

8 1. Shenzhen Hospital of Southern Medical University, Shenzhen, Guangdong  
9 province, 518000

10 2. Department of Medicine, Li Ka Shing Faculty of Medicine, University of Hong  
11 Kong, Hong Kong, China

12 3. The State Key laboratory of Pharmaceutical Biotechnology, Hong Kong, China

13 4. School of Stomatology and Medicine, Foshan University, Foshan, China,  
14 528000

15 5. The Third Affiliated Hospital of Guangzhou Medical University, Guangzhou,  
16 Guangdong, China, 518000

17 6. Yearth Biotechnology Co. Ltd., Changsha, China, 410000

18 7. Hunan Engineering Research Center for Obesity and Its Metabolic  
19 Complications, Xiangya Hospital, Central South University, Changsha,  
20 China 410000

21

22 Running Head: Altered microbiota in female osteoporosis

23

24 #Leading corresponding author: Aimin Xu, Professor, University of Hong Kong  
25 & Director of the State Key laboratory of Pharmaceutical Biotechnology. E-  
26 mail :amxu@hku.hk; Contribution to the study: professor, director, responsible  
27 for the overall design and guidance of the project )

28 #Co-corresponding author: Kejian Wang, Associate Professor of Guangzhou  
29 Medical University, E-mail: [kejian.wang@gzhmu.edu.cn](mailto:kejian.wang@gzhmu.edu.cn) ( Contributions to this  
30 study: data analysis and processing of intestinal flora structure and gene  
31 polymorphism detection, and guidance of paper writing ) and Yi Pan, Associate  
32 Professor of Hunan Engineering Research Center for Obesity and Its Metabolic  
33 Complications, Xiangya Hospital, Central South University, E-mail: pan\_yi@  
34 csu.edu.cn. ( Contributions to this study: post doctorate, Responsible for the  
35 establishment, detection, analysis and quality control of the database of intestinal  
36 flora structure and gene polymorphism )

37

38 CuiFeng Zhu, Jianguo Liu and Yong Pan contributed equally to this work. Author  
39 order was determined on the basis of seniority. ( CuiFeng Zhu, Department  
40 director of Dept of Clinical Nutrition, chief physician, master tutor of Shenzhen  
41 hospital of southern medical university. Post doctor fellows of Dept of  
42 endocrinology of university of Hong Kong & The State Key laboratory of  
43 Pharmaceutical Biotechnology. E-mail :1794371266@qq.com ( Contributions to  
44 this study: chief physician of Nutrition department and post doctorate, responsible  
45 for the design and implementation of this project, data collation and paper  
46 writing ) ; JianGuo Liu, Associate chief physician, Department director of Dept  
47 of Health management of Shenzhen hospital of southern medical University. E-

48 mail : JgLiu123@163.com (Contribution to this study: general practitioner at  
49 health management center, responsible for case collection and data collation) ;  
50 Pan Yong, Post doctor fellows of Dept of endocrinology of university of Hong  
51 Kong & The State Key laboratory of Pharmaceutical Biotechnology. E-mail:  
52 panicy0322@ hotmail.com. (Contributions to this study: post doctorate,  
53 responsible for data collation and thesis writing guidance of this project)

54

55 Other author :

56 Ye Fan: School of Stomatology and Medicine, Foshan University, Foshan, China,  
57 528000, E-mail: [lhfanye@126.com](mailto:lhfanye@126.com). Tele Phone: 13560735015 (Contribution to  
58 this study: visiting scholar, responsible for the data processing of intestinal  
59 microflora gene polymorphism test results)

60 Leigang Jin: Department of Medicine, Li Ka Shing Faculty of Medicine,  
61 University of Hong Kong & The State Key laboratory of Pharmaceutical  
62 Biotechnology, Hong Kong, China. E-mail: [jinlg520@hku.hk](mailto:jinlg520@hku.hk). (Contributions to  
63 this study: doctor student, responsible for the early data processing of intestinal  
64 microflora gene polymorphism)

65 Yan Liu: Shenzhen Hospital of Southern Medical University, Shenzhen,  
66 Guangdong province, 518000, E-mail: [853028990@qq.com](mailto:853028990@qq.com), 13570469574  
67 (Contribution to this study: Nutrition department attending physician, in  
68 charge of the medical history of selected patients, menstrual history, life history  
69 and other data survey)

70 Zhentian Zhang: Shenzhen Hospital of Southern Medical University, Shenzhen,  
71 Guangdong province, 518000. E-mail: 13365854123@163.com, 13544154119.

72 (Contribution to this study: a nutritionist was responsible for the investigation of  
73 intestinal mucosal barrier function in selected patients with medical history and  
74 other data)

75 Yu Gan: The Third Affiliated Hospital of Guangzhou Medical University, E-mail:  
76 cf-zhu@163.com. (Contribution to this study: biomedical engineer, responsible  
77 for the analysis and processing of intestinal flora structure and gene  
78 polymorphism detection data)

79 Wei Tang: Yearth Biotechnology Co. Ltd., Changsha, China, 410000, E-mail:  
80 tangwei@yearth.cn, 0731-88709258. (Contribution to this study: biomedical  
81 engineer, responsible for the extraction of fecal intestinal flora RNA and reverse  
82 transcription of DNA)

83 Jinhuan Li: Yearth Biotechnology Co. Ltd., Changsha, China, 410000, E-mail:  
84 lijinhuan@yearth.cn, 0731-88709258. (Contribution to this study: biomedical  
85 engineer, responsible for the extraction of fecal intestinal flora RNA and reverse  
86 transcription of DNA)

87 Zhuang Xiong: Yearth Biotechnology Co. Ltd., Changsha, China, 410000, E-mail:  
88 xiongzhuang@yearth.cn, 0731-88709258. (Contribution to this study:  
89 biomedical engineer, responsible for the detection and analysis report of fecal  
90 intestinal flora gene polymorphism)

91 Genming Xu: Yearth Biotechnology Co. Ltd., Changsha, China, 410000, E-mail:  
92 xugenming@yearth.cn, 0731-88709258. (Contribution to this study: biomedical  
93 engineer, responsible for the detection and analysis report of fecal intestinal flora  
94 gene polymorphism)

- 95 Xiuping Lin: Shenzhen Hospital of Southern Medical University, Shenzhen,  
96 Guangdong province, 518000. E-mail: 895819039@qq. com, 13500053960.  
97 (Contribution to this study: head nurse at health management center, responsible  
98 for case collection and collection of serum and stool samples from  
99 perimenopausal women)
- 100 Yuan Zhang: Shenzhen Hospital of Southern Medical University, Shenzhen,  
101 Guangdong province, 518000. E-mail: 417053629@qq.com, 15118092923.  
102 (Contributions to this study: Health management Centre general practitioner,  
103 perimenopausal female case collection and collection of serum and stool samples)
- 104 JinChuan Cai: Shenzhen Hospital of Southern Medical University, Shenzhen,  
105 Guangdong province, 518000. E-mail: e-mail:13600158985@163.com,  
106 13600158985. (Contributions to this study: Technician at the health management  
107 center, bone density measurement.)
- 108 Muxiu Yang: Shenzhen Hospital of Southern Medical University, Shenzhen,  
109 Guangdong province, 518000. E-mail:421643681@qq.com, 13823236331.  
110 (Contributions to this study: : Biomedical engineer, responsible for bone  
111 density analysis in this study)
- 112 Leijun Zhang: Shenzhen Hospital of Southern Medical University, Shenzhen,  
113 Guangdong province, 518000. E-mail: 228802383@qq.com, 13802278833.  
114 (Contributions to this study: Orthopedic surgeon at health management center,  
115 case collection)
- 116 Liehui Xiao: Shenzhen Hospital of Southern Medical University, Shenzhen,  
117 Guangdong province, 518000. E-mail: 516672562@qq.com, 13189097298.  
118 Contributions to this study: integrated medicine physician, case collection)

119

## 120 **Abstract**

121 **Background:** Gut microbiota, mainly characterized by fecal bacterial  
122 compositions, affects human immune system and pathophysiological  
123 development. Our aim was to measure the quantitative differences of  
124 fecal bacterial compositions between osteoporotic patients and healthy  
125 subjects, and to identify novel bacterial taxa that speculate the  
126 incidence of osteoporosis in female.

127

128 **Method:** We recruited 104 female subjects, including 45 osteoporotic  
129 individuals and 59 healthy control. Fecal samples were collected for  
130 further analysis by 16S rRNA quantitative arrays and bioinformatics  
131 analysis.

132

133 **Results:** Analyses of  $\alpha$ - and  $\beta$ -diversity demonstrated that the diversity  
134 and composition of fecal bacterial compositions were both significant  
135 different in osteoporosis group, as compared with healthy group.  
136 Multiple bacterial genera were significantly increased (e.g., Roseburia  
137 and Bacteroides) or decreased (e.g., Streptococcus and Dorea) in the  
138 osteoporotic cases. Furthermore, the osteoporosis could be efficiently

139 determined by the random forest model based on differential taxa (area  
140 under ROC curve = 0.93).

141

142 **Conclusion:** There were obvious different fecal microbial  
143 characteristics between female osteoporosis and healthy subjects. These  
144 findings provided evidence for understanding the host-gut microbiota  
145 interplay in female osteoporosis, and supported clinical applications of  
146 gut microbiota analysis for female osteoporosis diagnosis

147

148 **Keywords:** osteoporosis; gut microbiota; 16S rRNA sequencing;  
149 bioinformatics analysis; intestinal permeability

150

151 Author Contribution:

152 **Cuifeng Zhu<sup>1,2,3,★</sup>, Jianguo Liu <sup>1★</sup>, Yong Pan<sup>2,3★</sup>, Yi Pan<sup>4</sup>, Ye**  
153 **Fan<sup>5</sup>,Leigang Jin<sup>2,3</sup>, Yan Liu<sup>1</sup>, Zhentian Zhang<sup>1</sup>, Yu Gan<sup>6</sup>, Wei**  
154 **Tang<sup>7</sup> , Jinhuan Li<sup>7</sup> , Zhuang Xiong<sup>7</sup> , Genming Xu<sup>7</sup> , Xiuping**  
155 **Lin<sup>1</sup>, JinChuan Cai<sup>1</sup>,Yuan Zhang<sup>1</sup>, Muxiu Yang<sup>1</sup>, Leijun Zhang<sup>1</sup>,**  
156 **Liehui Xiao<sup>1</sup>, Kejian Wang<sup>6#</sup>, Aimin Xu<sup>2,3#</sup>**

## 157 **Introduction**

158 Osteoporosis is characterized by low bone mass and increased  
159 bone fragility (1,2). The deterioration of bone tissue architecture in  
160 osteoporosis is mainly caused by imbalanced bone formation slower  
161 than bone resorption (3), which increases the incidence of bone  
162 fractures. Osteoporotic fractures result in a heavy burden to health  
163 services worldwide, especially increased morbidity and reduced  
164 survival in the elderly(4,5).

165 Conventional therapeutic interventions on osteoporosis include  
166 general lifestyle changing (e.g., balanced diet and regular exercise) (6),  
167 and intake of approved drugs (e.g., oestrogen and bisphosphonates) (7).  
168 In recent years, a series of studies suggested that gut microbiota  
169 colonizing in the intestinal tract not only affected the nutrition  
170 metabolism, but also contributed to the occurrence and progression of  
171 osteoporosis (8). Das et al. reported there were differences of gut  
172 microbiota composition between osteoporosis /osteopenia and controls  
173 with an Irish cohort of older adults (9). Wang et al. analyzed the gut  
174 microbiota diversity in a relatively small sample with 6 primary  
175 osteoporosis patients, 6 osteopenia patients and 6 healthy controls (10).  
176 Li et al. identified several differential fecal bacterial taxa from patients  
177 with low bone mineral density (11). However, the above research  
178 findings were based on subjects without considering sex, and the  
179 results were also inconsistent.



180 Osteoporosis is a typical disease of females. One key reason is the  
181 sudden decline of estrogen production for women after the menopause  
182 but a gradual process for men (12). Therefore, hormone replacement  
183 therapy effectively decreased the risk of bone fracture in post-  
184 menopausal women (13,14). It indicated that the pathophysiology of  
185 osteoporosis may differ between women and men. However, current  
186 fecal microbial studies on osteoporosis mixed female and male subjects  
187 together for analysis, leading to the misunderstanding of female-  
188 specific characteristics. To this end, the present study aimed to  
189 investigate the alterations in gut microbiota of female osteoporotic  
190 patients using 16S rRNA high-throughput sequencing analysis. The  
191 results could provide bioinformatics characteristics of dysbiosis in  
192 osteoporotic women, thus helping to guide probiotics treatment and  
193 primary prevention.

194

## 195 **Materials and Methods**

### 196 Patient recruitment and bone mineral density examination

197 This study was approved by the Ethics Committee of Shenzhen  
198 Hospital of Southern Medical University. Written informed consent  
199 was signed by all participants prior to enrollment. BMD values at  
200 skeleton sites of the lumbar spine and the total hip joint were obtained  
201 using dual-energy X-ray absorptiometry (DXA) (Discovery™ CI,

202 QDR SERIES, HOLDGIC). Subject with BMD T-Score < -2.5 were  
203 classified into osteoporotic group, whereas participants with BMD T-  
204 Score > 1.0 were classified into the control group. Those subjects  
205 meeting the following criteria were excluded for study: (1) use of  
206 antibiotics or hormone within 6 months before enrollment, (2)  
207 undergoing gastrointestinal diseases, and (3) history of hypothyroidism  
208 or hyperthyroidism. Finally, 104 participants (45 osteoporosis cases  
209 and 59 controls) were included in analysis.

#### 210 Fecal sample collection and DNA extraction

211 Fresh fecal samples were collected in sterile tubes and frozen at  
212 -80 °C for further use. Genomic DNA was extracted from each fecal  
213 sample using QIAamp Fast DNA Stool Mini Kit (QIAGEN, Germany)  
214 according to the manufacturer's instructions. The amount of DNA was  
215 determined by NanoDrop 2000 UV-via spectrophotometer (Thermo  
216 Scientific, USA). Integrity and size of DNA were checked by 0.8%  
217 (w/v) agarose gel electrophoresis in 0.5 mg/ml ethidium bromide.

218

#### 219 16S rRNA sequencing

220 We amplified the V3-V4 hypervariable regions of 16S rRNA gene  
221 using the following PCR primers: forward 5'-  
222 CCTACGGGRSGCAGCAG-3' and reverse 5'-  
223 GGACTACVVGGGTATCTAATC-3'. PCR amplification was

224 performed in a mixture containing 1.0 µl of forward primer, 1.0 µl of  
225 reverse primer and 6.0 µl of DNA. The reactions were started at 96 °C  
226 for 30 s, followed by 40 cycles of 96 °C for 15 s, 60 °C for 15 s, and  
227 75 °C for 15 s, with a final extension step at 75 °C for 1 min. The  
228 concentration of DNA libraries was quantified using PicoGreen DNA  
229 Assay (Invitrogen, USA). Pooled DNA libraries were diluted to 10  
230 pM and denatured in 0.2N NaOH, mixed with PhiX control library  
231 (Illumina Inc., USA), and paired-end sequenced (2 × 250 bp) on the  
232 Illumina MiSeq platform.

233

#### 234 Sequencing data analysis

235 The Quantitative Insights Into Microbial Ecology pipeline was  
236 employed to process the sequencing data (15). Paired-end reads were  
237 merged using PANDAseq, sequences were de-noised using USEARCH  
238 (ver. 8.0.1623), and chimera checked with UCHIME26. Operational  
239 Taxonomic Units (OTUs) were picked at 97% similarity and  
240 representative sequences were generated. Sequences were aligned with  
241 PyNAST using Greengenes database and taxonomy assigned to the  
242 lowest possible taxonomic level using the Ribosomal Database Project  
243 Classifier at a 80% bootstrap value threshold. OTUs found in above 50%  
244 samples were retained. The numbers of sequences were normalized for  
245 further analyses.

246 The ACE, Chao, Shannon and Simpson index were calculated to  
247 assess  $\alpha$ -diversity. Principal coordinate analysis (PCoA) and non-  
248 metric multidimensional scaling (NMDS) based on Bray-Curtis  
249 distance of OTUs were performed to provide an overview of the  
250 between-group bacterial difference (i.e,  $\beta$ -diversity). The Pearson's  
251 correlation coefficient was calculated to evaluate the association  
252 between bacteria abundance and bone mass density. Statistical analyses  
253 and data visualization were performed using R software package  
254 (version 3.5.1).

255

## 256 **Results**

### 257 **Characteristics of study subjects**

258 A total of 45 osteoporosis patients and 59 healthy controls were  
259 recruited according to the inclusion and exclusion criteria (Table 1).  
260 There was no statistical difference in body mass index (BMI), alcohol  
261 intake, tobacco used and history of fracture, renal disease or  
262 osteoarthritis disease between two groups ( $p > 0.05$ ). The osteoporotic  
263 cases were generally older than the control subjects (average age 59.07  
264 vs 54.59). The osteoporosis group had significantly lower T-score, Z-  
265 score and BMD than the control group. The values of 25-oh-VD were  
266 decreased in osteoporosis cases as compared to control individuals.  
267 Notably, we also found significant lower level of diamine oxidase and

268 higher level of D-lactic acid and lipopolysaccharide (LPS) in  
269 osteoporosis group than in control group ( $P < 0.001$ ), suggesting  
270 undermined intestinal permeability in osteoporotic cases.

271

272 **Table 1. Characteristics of osteoporosis and control subjects.**

|                               | <b>Osteoporosis (n=45)</b> | <b>Control (n=59)</b> | <b>P-value<sup>#</sup></b> |
|-------------------------------|----------------------------|-----------------------|----------------------------|
| Age (mean±SD)                 | 59.07±7.41                 | 54.59±6.61            | 0.0017*                    |
| BMI (mean±SD)                 | 22.98±2.85                 | 23.52±3.61            | 0.41                       |
| Drinking, n (%)               | 12 (26.7)                  | 15 (25.4)             | 1.00                       |
| Smoking, n (%)                | 7 (15.6)                   | 9 (15.3)              | 1.00                       |
| T-Score                       | -2.74±0.57                 | 0.16±1.01             | 8.74×10 <sup>-32</sup> *   |
| LS T-score                    | -3.06±0.45                 | -0.18±0.41            | 2.22×10 <sup>-57</sup> *   |
| LS Z-score                    | -1.30±0.58                 | 1.69±0.18             | 4.05×10 <sup>-61</sup> *   |
| LS BMD (g/cm <sup>2</sup> )   | 0.65±0.06                  | 0.88±0.10             | 1.24×10 <sup>-24</sup> *   |
| Hip T-score                   | -2.72±0.44                 | 0.13±0.36             | 3.82×10 <sup>-60</sup> *   |
| Hip Z-score                   | -1.41±0.24                 | 1.36±0.17             | 2.94×10 <sup>-87</sup> *   |
| Hip BMD (g/cm <sup>2</sup> )  | 0.55±0.03                  | 0.83±0.05             | 2.74×10 <sup>-59</sup> *   |
| 25-oh-VD                      | 17.69±4.78                 | 45.01±6.58            | 1.29×10 <sup>-42</sup> *   |
| Diamine oxidase (U/L)         | 1.22±0.45                  | 3.05±0.58             | 4.71×10 <sup>-32</sup> *   |
| D-Lactic Acid (mg/L)          | 19.82±4.49                 | 7.12±1.34             | 1.02×10 <sup>-37</sup> *   |
| LPS (U/L)                     | 3.42±0.76                  | 0.98±0.42             | 2.00×10 <sup>-38</sup> *   |
| Fracture, n (%)               | 0 (0)                      | 0 (0)                 | 1.00                       |
| Renal Disease, n (%)          | 1 (2.2)                    | 0 (0)                 | 0.43                       |
| Osteoarthritis Disease, n (%) | 3 (6.7)                    | 0 (0)                 | 0.078                      |

273 <sup>#</sup> P-values were calculated with Fisher's exact test for nominal  
274 variables and Student's t-test for continuous variables.

275 \* Statistically significant difference between two groups.

276

277

278

## 279 Comparisons of gut microbial diversity

280 We performed  $\alpha$ -diversity analysis and found significant  
281 difference between osteoporotic and control groups. The osteoporosis  
282 cases exhibited higher values of ACE, Chao, Shannon indices and  
283 lower value of Simpson index ( $P < 0.01$ , Figure 1), suggesting that the  
284 microbial diversity is reduced in osteoporosis status. In addition, the  
285 analysis of the  $\beta$ -diversity calculated on Bray-Curtis dissimilarity and  
286 unweighted UniFrac distance both showed that microbiota composition  
287 of osteoporosis patients clustered apart from that of healthy controls  
288 (PERMANOVA  $P < 0.01$ , Figure 2), indicating between-group  
289 difference in microbiota composition.

290

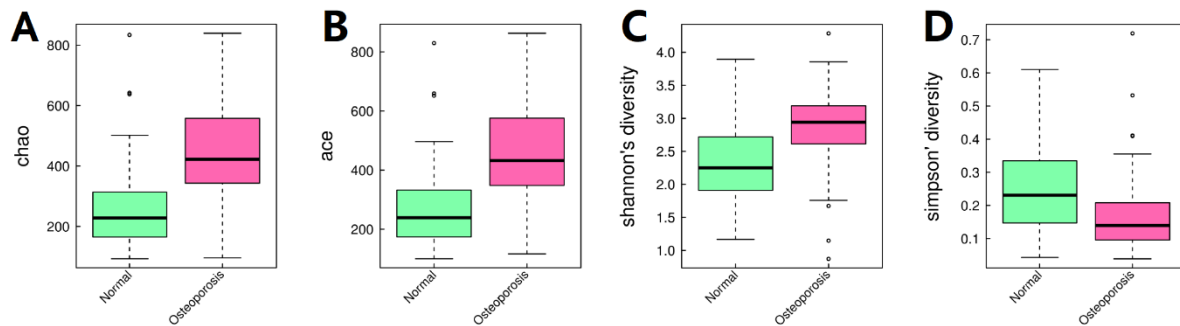

291

292 **Figure 1.** Comparison of  $\alpha$ -diversity measured by ACE (A), Chao (B),  
293 Shannon (C) and Simpson (D) indices.

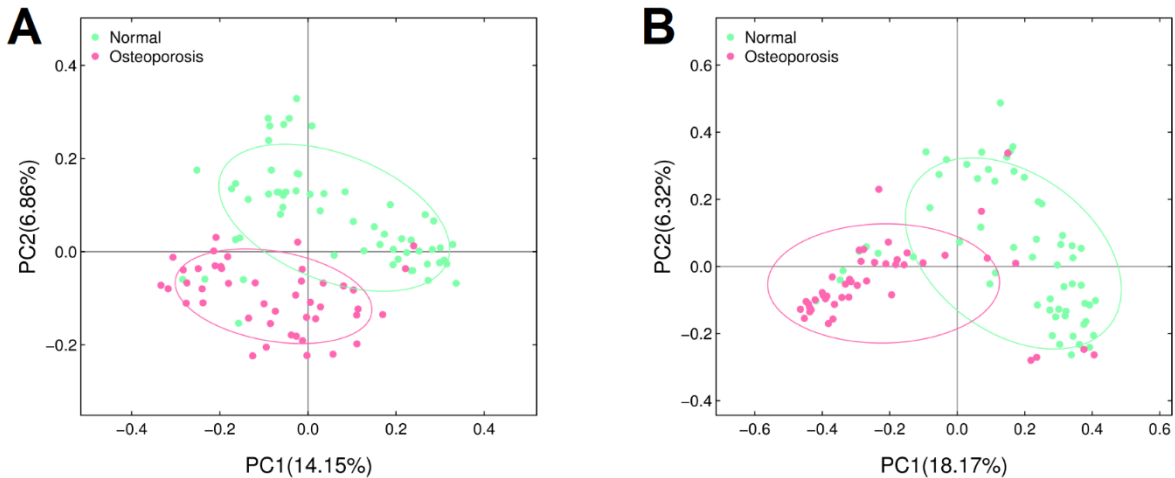

294

295 **Figure 2.** The normal subjects (green dots) and the osteoporosis cases  
296 (red dots) showed a separation in the principal coordinates analysis  
297 (PCoA) calculated with unweighted UniFrac distance (A) and Bray-  
298 Curtis dissimilarity (B).

299

### 300 Differences in taxonomic abundance

301 We applied linear discriminant analysis effect size (LEfSe)  
302 software to explore the changes of the bacterial community in the  
303 osteoporosis all taxa level. Interestingly, a series of taxa exhibited  
304 differential abundance between two groups. At the genus level, the  
305 abundance of 29 genera (e.g., Roseburia and Bacteroides) was  
306 significantly higher in the osteoporotic cases than in the normal  
307 controls. On the other hand, the proportion of 15 genera (e.g.  
308 Streptococcus and Dorea) was decreased in the osteoporosis group  
309 (Figure 3 and Table 2).



310 To test whether the distinctive microbiota composition can  
311 classify osteoporotic status, we trained a random forest model with all  
312 study subjects using the profiles of genus. As indicated by the receiver  
313 operating characteristic (ROC) curve, the variable of genus abundance  
314 was effective to classify osteoporosis cases from controls (AUC=0.93,  
315 95% CI 0.87-0.98, Figure 4A). A set of genera provided most of the  
316 discriminatory power, such as Roseburia, Streptococcus, Dorea and  
317 Flavonifractor (Figure 4B).

318

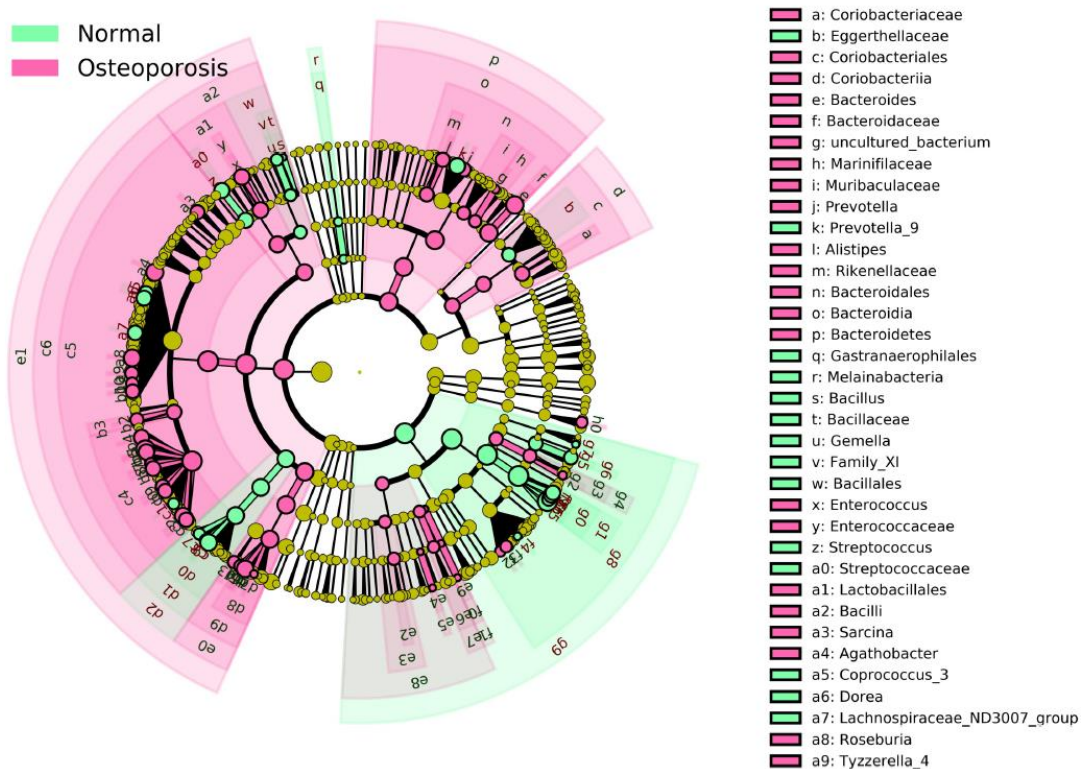

320 **Figure 3.** Taxonomic cladogram generated by LEfSe software showing  
321 alterations to gut bacterial communities in osteoporosis group.

322

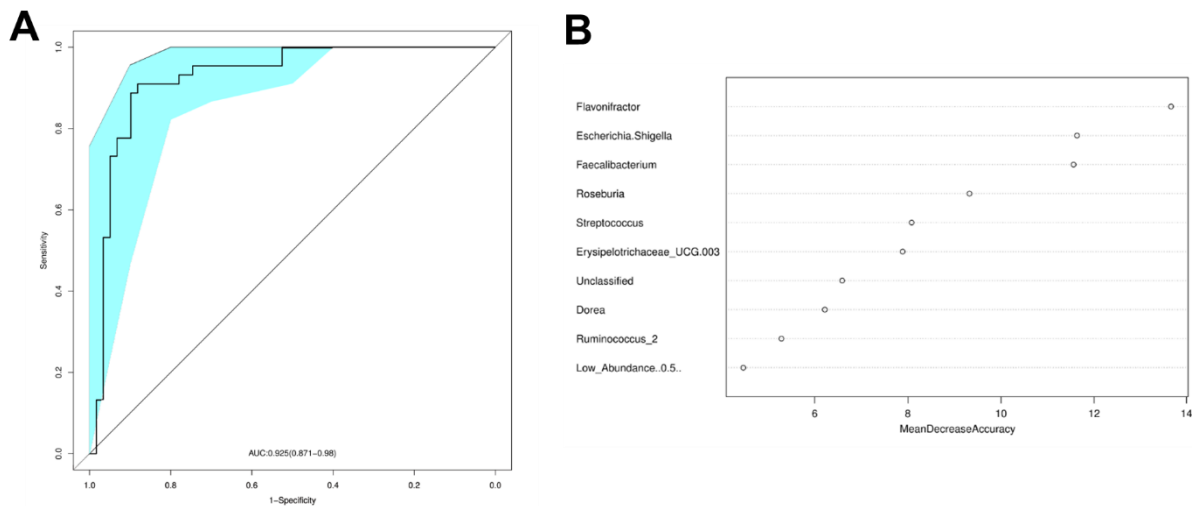

323

324 **Figure 4.** Gut microbiota signature which can be used to discriminate  
325 osteoporosis patients from normal controls. (A) Receiver operating  
326 characteristic curve for leave-one-out cross validation. (B) The top  
327 important genera in the discriminatory model as measured by  
328 mean decrease accuracy.

329

### 330 Gut microbiota and bone mass indicators

331 To evaluate whether osteoporosis leads to changes in the  
332 correlation between bone mass parameters and various taxa of the gut  
333 microbiota, we further performed Pearson's correlation analysis. We  
334 identified only one genus, Roseburia, was negatively correlated with  
335 both T-score and Hip T-score ( $P < 0.05$ ). In other words, the abundance

336 of *Roseburia* genus was changed along with not only osteoporosis  
337 status but also severity of bone loss.

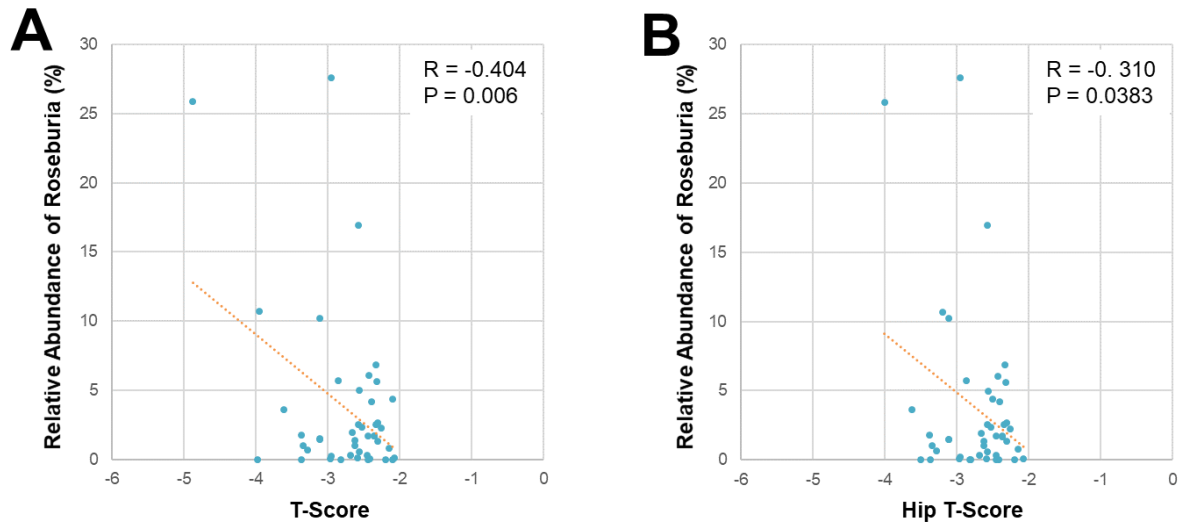

338  
339 **Figure 5.** Correlation between bone mass level and the relative  
340 abundance of the genus *Roseburia*. (A) T-score. (B) Hip T-score.

341  
342 **Discussion**

343 Conventional osteoporosis therapies focused on mitigating the loss  
344 of bone associated with decreases of sex steroids (16). With increasing  
345 knowledge about the pathology of osteoporosis, clinical research of  
346 new targets for therapeutic intervention is directed to gut microbiome  
347 associated to bone resorption and formation (17). In this study, we  
348 conducted 16S rRNA sequencing to compare the composition of gut  
349 microbiota between osteoporotic patients and control subjects.

350 Our results showed significant differences in the alpha diversity and  
351 the abundance of specific taxa in gut microbiome associated with  
352 osteoporosis. To date, there have been only several studies analyzing  
353 the alternations of gut microbiota in osteoporotic patients (9-11).  
354 However, the pooled female and male together or number limitation  
355 resulted inconsistent findings. Here we focused on the gut dysbiosis of  
356 female subjects with osteoporotic condition. One of our most notable  
357 performance was a clear distinction between osteoporotic cases and  
358 control subjects. Random forest model trained with microbiota  
359 composition data can effectively classify osteoporotic status, with the  
360 area under ROC curve reaching 0.93. Such improvement suggested that  
361 the risk and progress of female osteoporosis may be to a certain extent  
362 predicable by gut microbiota characteristics.

363 In our study, gut dysbiosis was characterized by a series of  
364 differential abundant genera in osteoporosis group. For example, we  
365 found an increased abundance of *Bacteroides* genus in osteoporosis  
366 group, which is consistent with previous report (11). *Bacteroides* is one  
367 of the most dominant genera in both osteoporotic individuals and  
368 normal subjects samples (10). As previously reported, *Bacteroidetes*  
369 might be involved in bone formation and bone resorption by deposition  
370 and hydrolysis of serine dipeptide lipids (18). Another noteworthy  
371 genus was *Roseburia* belonging to Firmicutes phylum. As an important  
372 producer of various short-chain fatty acids (SCFAs), *Roseburia*

373 mediated the changes of IGF-1 expression and contributed to bone  
374 growth (19). Consistent to our finding, Roseburia was also found to be  
375 decreased in osteoporosis in the research with mixed female and male  
376 subject (11). More importantly, our results showed a significant  
377 enrichment of Roseburia among osteoporotic individuals, which served  
378 as one of the most efficient features in random forest model for  
379 discriminating patients from controls. Such inconsistency may be due  
380 to sex difference in pathogenesis of osteoporosis, since the interplay  
381 between microbiota and bone loss was dependent on sex steroid (20,  
382 21). To explain the possible inconsistency, we will further investigate  
383 the role of sex steroid involvement in osteoporosis based on larger  
384 cohort and animal experiments.

385 Another major strength of our research was that we identified some  
386 clinical association in clinical parameters to support our hypothesis. It  
387 was firstly reported that there were abnormal levels of diamine oxidase,  
388 D-lactic acid and lipopolysaccharides (LPS) in osteoporotic patients.  
389 Circulating endotoxin, mainly composed by LPS, was secreted from  
390 intestine, and the intestinal permeability determined the secretory levels.  
391 Estrogen deficiency can influence intestinal epithelial permeability  
392 through mediating estrogen-associated pathways (22). All these  
393 findings together pointed to a possible theory that the estrogen level  
394 and the abundance of various bacterial taxa were both altered in  
395 osteoporosis status (23). The combined effects of estrogen deficiency

396 and gut dysbiosis on intestinal permeability can mediate bone loss and  
397 osteoporosis via influencing the host metabolism, endocrine, and  
398 immunity (24), which might provide potential targets for the clinical  
399 treatment of post-menopausal osteoporosis.

400 On the other hand, several limitations of our results should be taken  
401 into consideration. based on the design of cross-sectional study, it was  
402 not possible to clarify the causal relationship between gut microbiota  
403 and osteoporosis. Since samples were collected after diagnosis, the  
404 changes of gut microbiota might be either a consequence of  
405 osteoporosis or the cause. Therefore, further study was required with  
406 larger sample size or well-controlled interventions on gut microbiota.

407 In summary, we described the altered profiles of gut microbiota in  
408 female osteoporotic patients, and provided evidence for the relationship  
409 between dysbiosis and osteoporosis. Our results pointed towards to  
410 early prevention and clinical management of osteoporosis by  
411 monitoring the homeostasis of gut microbiota.

412

## 413 **Acknowledgements**

414 This study is supported by the Hong Kong General Research Fund.  
415 (201306151203), HKU Small Project Funding (201409176257),  
416 Science and technology program of medical and health of Shenzhen  
417 health committee of the NPC (SZFZ2017057), "Miao miao" cultivation

418 program of Shenzhen hospital of southern medical university  
419 (2017MM01 and 2018MM11), Shenzhen Baoan district science and  
420 technology program basic research project (2017JD006 and  
421 2017JD085), Key Research & Development Plan, Hunan,  
422 China(2016JC2071) and Project of Hunan Committee, Hunan,  
423 China(20201923). and the Research Fund for Lin He's Academician  
424 Workstation of New Medicine and Clinical Translation.

425

426

## 427 **References**

- 428 1. Raisz LG. 2005. Pathogenesis of osteoporosis: concepts, conflicts, and prospects. *J Clin Invest*  
429 115:3318-25.
- 430 2. Sandhu SK, Hampson G. 2011. The pathogenesis, diagnosis, investigation and management of  
431 osteoporosis. *J Clin Pathol* 64:1042-50.
- 432 3. Drake MT, Clarke BL, Lewiecki EM. 2015. The Pathophysiology and Treatment of Osteoporosis.  
433 *Clin Ther* 37:1837-50.
- 434 4. Demontiero O, Vidal C, Duque G. 2012. Aging and bone loss: new insights for the clinician. *Ther*  
435 *Adv Musculoskelet Dis* 4:61-76.
- 436 5. Mohd-Tahir NA, Li SC. 2017. Economic burden of osteoporosis-related hip fracture in Asia: a  
437 systematic review. *Osteoporos Int* 28:2035-2044.
- 438 6. Feskanich D, Willett W, Colditz G. 2002. Walking and leisure-time activity and risk of hip  
439 fracture in postmenopausal women. *JAMA* 288:2300-6.
- 440 7. Rossouw JE, Anderson GL, Prentice RL, LaCroix AZ, Kooperberg C, Stefanick ML, Jackson RD,  
441 Beresford SA, Howard BV, Johnson KC, Kotchen JM, Ockene J, Writing Group for the Women's  
442 Health Initiative I. 2002. Risks and benefits of estrogen plus progestin in healthy  
443 postmenopausal women: principal results From the Women's Health Initiative randomized  
444 controlled trial. *JAMA* 288:321-33.
- 445 8. Xu X, Jia X, Mo L, Liu C, Zheng L, Yuan Q, Zhou X. 2017. Intestinal microbiota: a potential target  
446 for the treatment of postmenopausal osteoporosis. *Bone Res* 5:17046.
- 447 9. Das M, Cronin O, Keohane DM, Cormac EM, Nugent H, Nugent M, Molloy C, O'Toole PW,  
448 Shanahan F, Molloy MG, Jeffery IB. 2019. Gut microbiota alterations associated with reduced  
449 bone mineral density in older adults. *Rheumatology (Oxford)* 58:2295-2304.
- 450 10. Wang J, Wang Y, Gao W, Wang B, Zhao H, Zeng Y, Ji Y, Hao D. 2017. Diversity analysis of gut  
451 microbiota in osteoporosis and osteopenia patients. *PeerJ* 5:e3450.
- 452 11. Li C, Huang Q, Yang R, Dai Y, Zeng Y, Tao L, Li X, Zeng J, Wang Q. 2019. Gut microbiota  
453 composition and bone mineral loss-epidemiologic evidence from individuals in Wuhan, China.  
454 *Osteoporos Int* 30:1003-1013.

- 455 12. Guggenbuhl P. 2009. Osteoporosis in males and females: Is there really a difference? *Joint*  
456 *Bone Spine* 76:595-601.
- 457 13. Khadilkar AV, Mandlik RM. 2015. Epidemiology and treatment of osteoporosis in women: an  
458 Indian perspective. *Int J Womens Health* 7:841-50.
- 459 14. Anderson GL, Limacher M, Assaf AR, Bassford T, Beresford SA, Black H, Bonds D, Brunner R,  
460 Brzyski R, Caan B, Chlebowski R, Curb D, Gass M, Hays J, Heiss G, Hendrix S, Howard BV, Hsia J,  
461 Hubbell A, Jackson R, Johnson KC, Judd H, Kotchen JM, Kuller L, LaCroix AZ, Lane D, Langer RD,  
462 Lasser N, Lewis CE, Manson J, Margolis K, Ockene J, O'Sullivan MJ, Phillips L, Prentice RL,  
463 Ritenbaugh C, Robbins J, Rossouw JE, Sarto G, Stefanick ML, Van Horn L, Wactawski-Wende J,  
464 Wallace R, Wassertheil-Smoller S, Women's Health Initiative Steering C. 2004. Effects of  
465 conjugated equine estrogen in postmenopausal women with hysterectomy: the Women's  
466 Health Initiative randomized controlled trial. *JAMA* 291:1701-12.
- 467 15. Kuczynski J, Stombaugh J, Walters WA, Gonzalez A, Caporaso JG, Knight R. 2011. Using QIIME  
468 to analyze 16S rRNA gene sequences from microbial communities. *Curr Protoc Bioinformatics*  
469 Chapter 10:Unit 10 7.
- 470 16. Manolagas SC. 2013. Steroids and osteoporosis: the quest for mechanisms. *J Clin Invest*  
471 123:1919-21.
- 472 17. Villa CR, Ward WE, Comelli EM. 2017. Gut microbiota-bone axis. *Crit Rev Food Sci Nutr*  
473 57:1664-1672.
- 474 18. Nemati R, Dietz C, Anstadt EJ, Cervantes J, Liu Y, Dewhirst FE, Clark RB, Finegold S, Gallagher JJ,  
475 Smith MB, Yao X, Nichols FC. 2017. Deposition and hydrolysis of serine dipeptide lipids of  
476 *Bacteroidetes* bacteria in human arteries: relationship to atherosclerosis. *J Lipid Res* 58:1999-  
477 2007.
- 478 19. Yan J, Herzog JW, Tsang K, Brennan CA, Bower MA, Garrett WS, Sartor BR, Aliprantis AO,  
479 Charles JF. 2016. Gut microbiota induce IGF-1 and promote bone formation and growth. *Proc*  
480 *Natl Acad Sci U S A* 113:E7554-E7563.
- 481 20. Li JY, Chassaing B, Tyagi AM, Vaccaro C, Luo T, Adams J, Darby TM, Weitzmann MN, Mülle JG,  
482 Gewirtz AT, Jones RM, Pacifici R. 2016. Sex steroid deficiency-associated bone loss is  
483 microbiota dependent and prevented by probiotics. *J Clin Invest* 126:2049-63.
- 484 21. Britton RA, Irwin R, Quach D, Schaefer L, Zhang J, Lee T, Parameswaran N, McCabe LR. 2014.  
485 Probiotic *L. reuteri* treatment prevents bone loss in a menopausal ovariectomized mouse  
486 model. *J Cell Physiol* 229:1822-30.
- 487 22. Hass MA, Nichol P, Lee L, Levin RM. 2009. Estrogen modulates permeability and prostaglandin  
488 levels in the rabbit urinary bladder. *Prostaglandins Leukot Essent Fatty Acids* 80:125-9.
- 489 23. Li L, Rao S, Cheng Y, Zhuo X, Deng C, Xu N, Zhang H, Yang L. 2019. Microbial osteoporosis: The  
490 interplay between the gut microbiota and bones via host metabolism and immunity.  
491 *Microbiologyopen* 8:e00810.
- 492 24. Yatsosky li D, Pan K, Shendge VB, Liu J, Ebraheim NA. 2019. Linkage of microbiota and  
493 osteoporosis: A mini literature review. *World J Orthop* 10:123-127.

494

495

496

497



498

## 医学伦理学委员会声明

### 国家自然科学基金委员会：

我单位朱翠凤同志申报的 2017 年国家自然科学基金研究项目《高脂饮食通过 LPS-TLR4-FABP4 途径加剧绝经后骨质疏松症进展的机制研究：基于肠道菌群紊乱-代谢性内毒素血症-骨代谢失调网络》中，关于使用研究对象血液、尿液和粪便等样本的内容，涉及医学伦理学范畴。我们将严格按照医学伦理学相关管理规定对其进行医学伦理学审查，并在我单位伦理委员会监督之下开展相关研究工作，确保研究符合伦理委员会相关规定，维护患者权益。

特此声明。

南方医科大学深圳医院医学伦理委员会

2017年2月20日

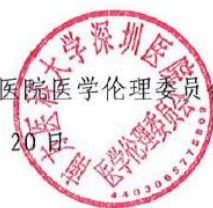

499
